# Supplementary material for: Improved photocatalytic activity of g-C3N4 derived from cyanamide–urea solution
Source: Royal Society of Chemistry journal article supplement (doi:10.1039/c4ra16362a), 2014-12-24
Supplement: c4ra16362a1.pdf [file c4ra16362a1.pdf]

## Supporting information

### **Improved photocatalytic activity of g-C<sub>3</sub>N<sub>4</sub> derived from cyanamide-urea solution**

Xiangqian Fan,<sup>a</sup> Zheng Xing,<sup>b</sup> Zhu Shu,<sup>c</sup> Lingxia Zhang<sup>\*a</sup>, Lianzhou Wang,<sup>b</sup> Jianlin Shi<sup>\*a</sup>

<sup>a</sup>State Key Laboratory of High Performance Ceramics and Superfine Microstructure, Shanghai Institute of Ceramics, Chinese Academy of Sciences, Shanghai 20050, PR China.

<sup>b</sup>ARC Centre of Excellence for functional Nanomaterials, School of Chemical Engineering, The University of Queensland, Brisbane, QLD 4072, Australia.

<sup>c</sup>Faculty of Material Science and Chemistry, China University of Geosciences, Wuhan 430074, PR China.

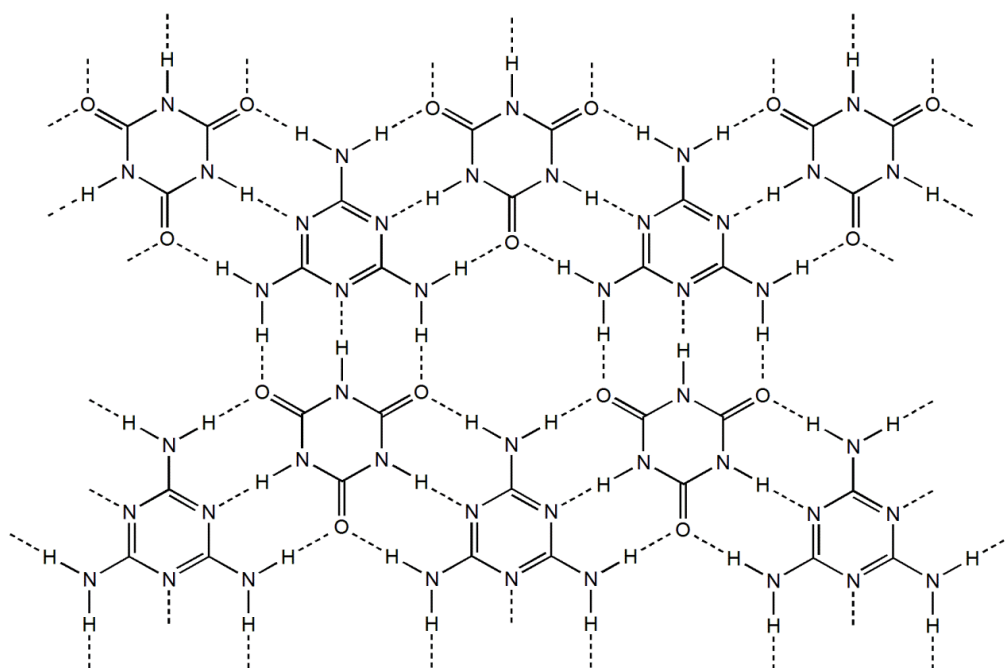

**Figure S1.** The structure model of melamine-cyanuric acid (MCA) complex

| <b>Table S1</b> Yield and elemental composition of the obtained g-C <sub>3</sub> N <sub>4</sub> at different temperatures. |                          |         |         |         |                    |
|----------------------------------------------------------------------------------------------------------------------------|--------------------------|---------|---------|---------|--------------------|
| Sample                                                                                                                     | Yield <sup>[a]</sup> / g | C / wt% | N / wt% | H / wt% | C/N <sup>[b]</sup> |
| CN-500                                                                                                                     | 3.48                     | 33.03   | 56.47   | 2.44    | 0.68               |
| CN-550                                                                                                                     | 3.18                     | 33.99   | 57.68   | 2.03    | 0.69               |
| CN-600                                                                                                                     | 3.05                     | 34.51   | 57.80   | 1.81    | 0.70               |
| CN-650                                                                                                                     | 2.76                     | 35.10   | 58.27   | 1.70    | 0.70               |
| CN-700                                                                                                                     | 1.44                     | 35.63   | 58.91   | 1.60    | 0.71               |

[a] obtained from solution containing 5 g cyanamide and 2.5 g urea; [b] molar ratio.

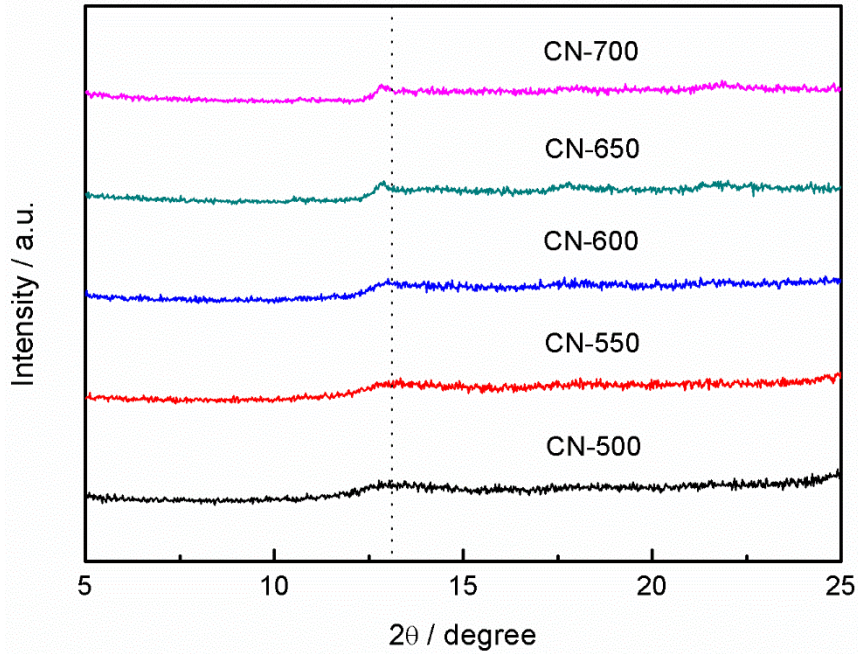

**Figure S2.** Enlarged XRD patterns (from 5°-25°) of g-C<sub>3</sub>N<sub>4</sub> samples prepared at different temperatures.

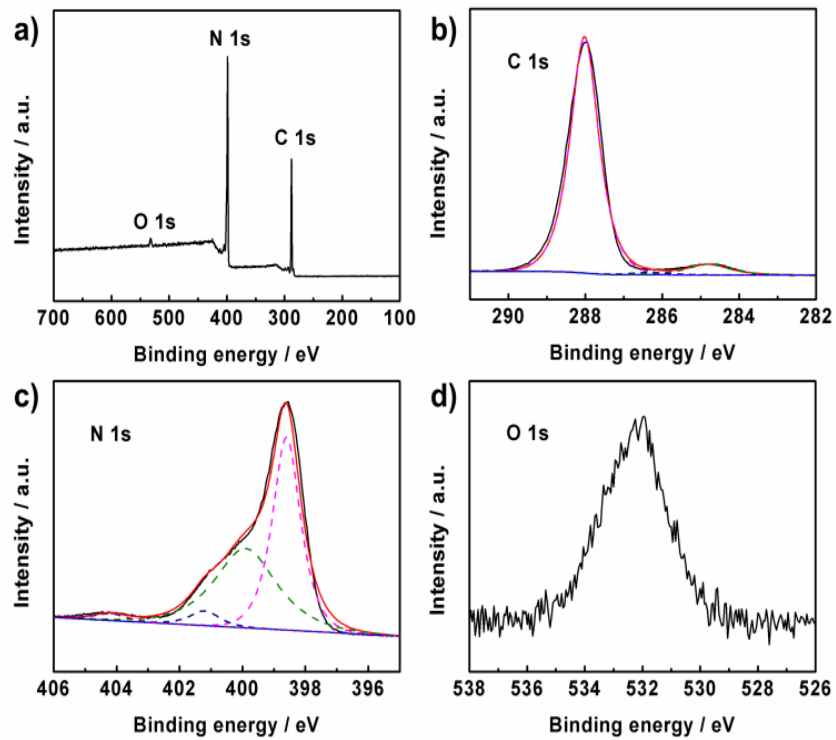

**Figure S3.** XPS spectrum of CN-700 (a) and the corresponding high resolution spectra of C 1s (b), N 1s (c) and O 1s (d).

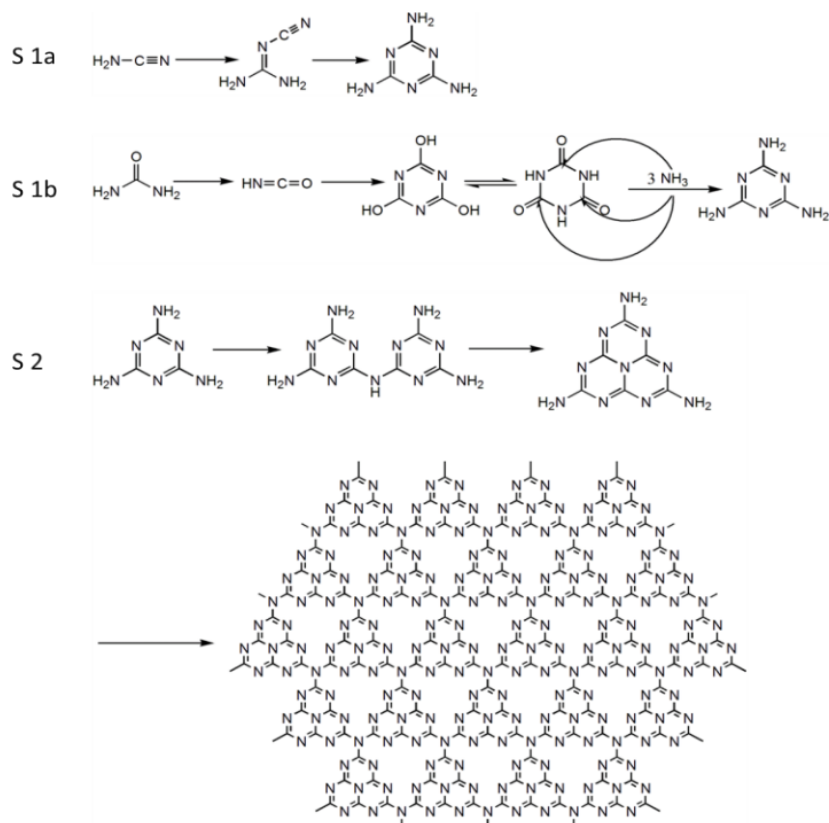

**Scheme S1.** The possible reaction path for the formation of g-C<sub>3</sub>N<sub>4</sub> from cyanamide-urea solution .  
S: the reaction step.

**Table S2** Physicochemical properties and photocatalytic activity of the obtained g-C<sub>3</sub>N<sub>4</sub> for H<sub>2</sub> evolution under visible light.

| Sample                                         | S <sub>BET</sub> / m <sup>2</sup> g <sup>-1</sup> | Band gap <sup>[a]</sup> / eV | HER <sup>[b]</sup> / μmolh <sup>-1</sup> |
|------------------------------------------------|---------------------------------------------------|------------------------------|------------------------------------------|
| g-C <sub>3</sub> N <sub>4</sub> <sup>[c]</sup> | 8.0                                               | 2.70                         | 9.6                                      |
| CN-500                                         | 3.0                                               | 2.74                         | 5.0                                      |
| CN-550                                         | 5.8                                               | 2.70                         | 5.5                                      |
| CN-600                                         | 15.3                                              | 2.65                         | 9.4                                      |
| CN-650                                         | 29.3                                              | 2.93                         | 22.8                                     |
| CN-700                                         | 36.3                                              | 3.01                         | 32.4                                     |

[a] estimated by optical measurements. [b] H<sub>2</sub> evolution rate. [c] synthesized by cyanamide polymerization.

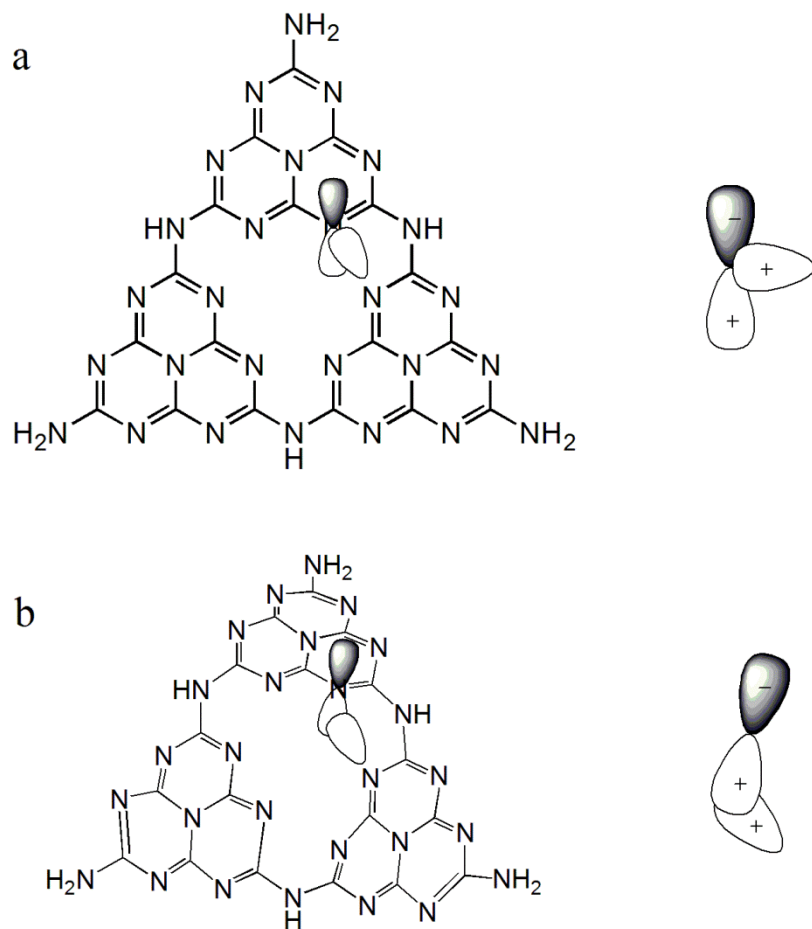

**Figure S4.** Overlap situations between p orbital and n orbital of (a) completely planarized  $g\text{-C}_3\text{N}_4$ ; (b) incompletely planarized  $g\text{-C}_3\text{N}_4$ .

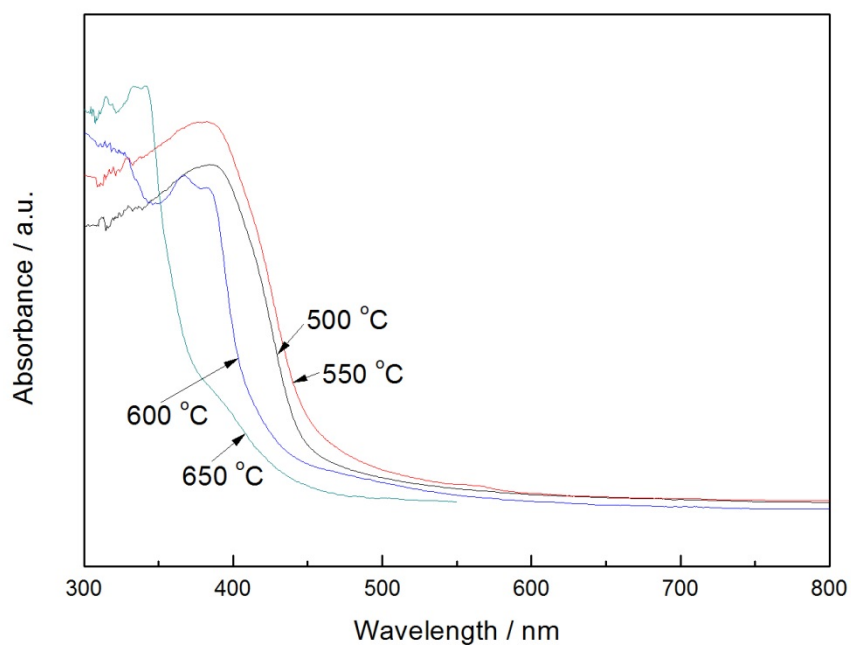

**Figure S5.** The UV-Vis diffuse reflectance absorption spectra of melamine-derived  $g\text{-C}_3\text{N}_4$  obtained at different temperatures.

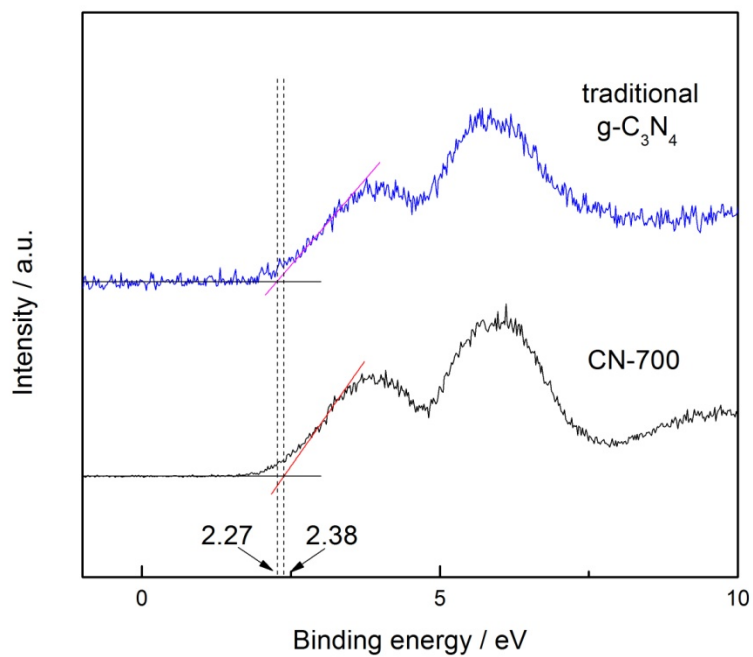

**Figure S6.** Valence band XPS spectra of traditional  $\text{g-C}_3\text{N}_4$  and CN-700.

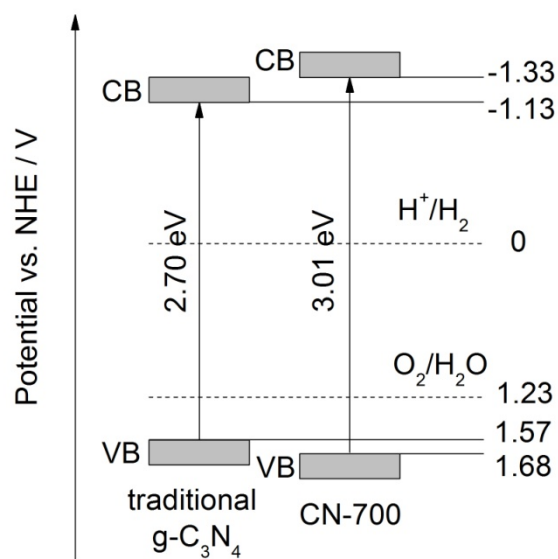

**Figure S7.** Electronic potential diagrams for traditional  $\text{g-C}_3\text{N}_4$  and CN-700.

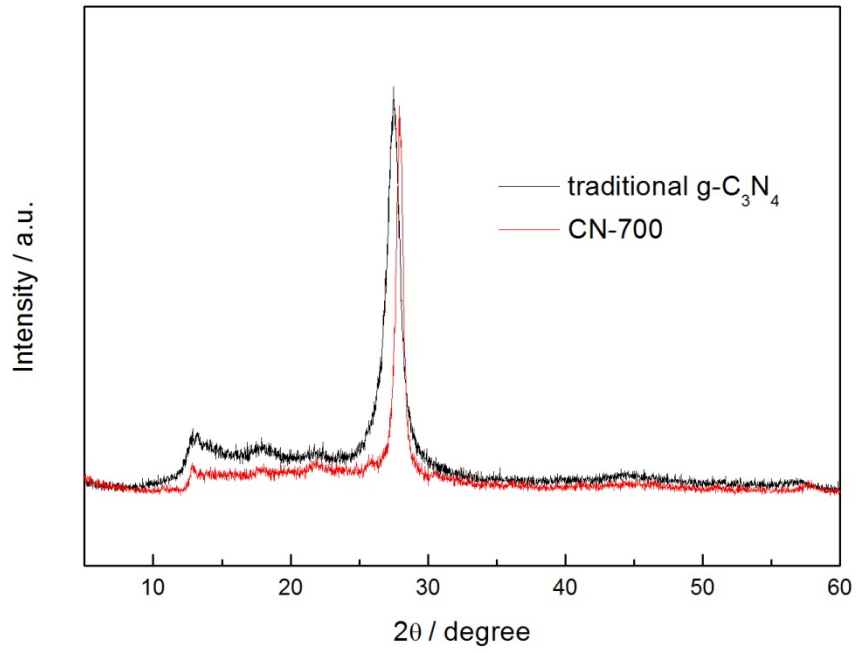

**Figure S8.** XRD patterns of traditional g-C<sub>3</sub>N<sub>4</sub> and CN-700.

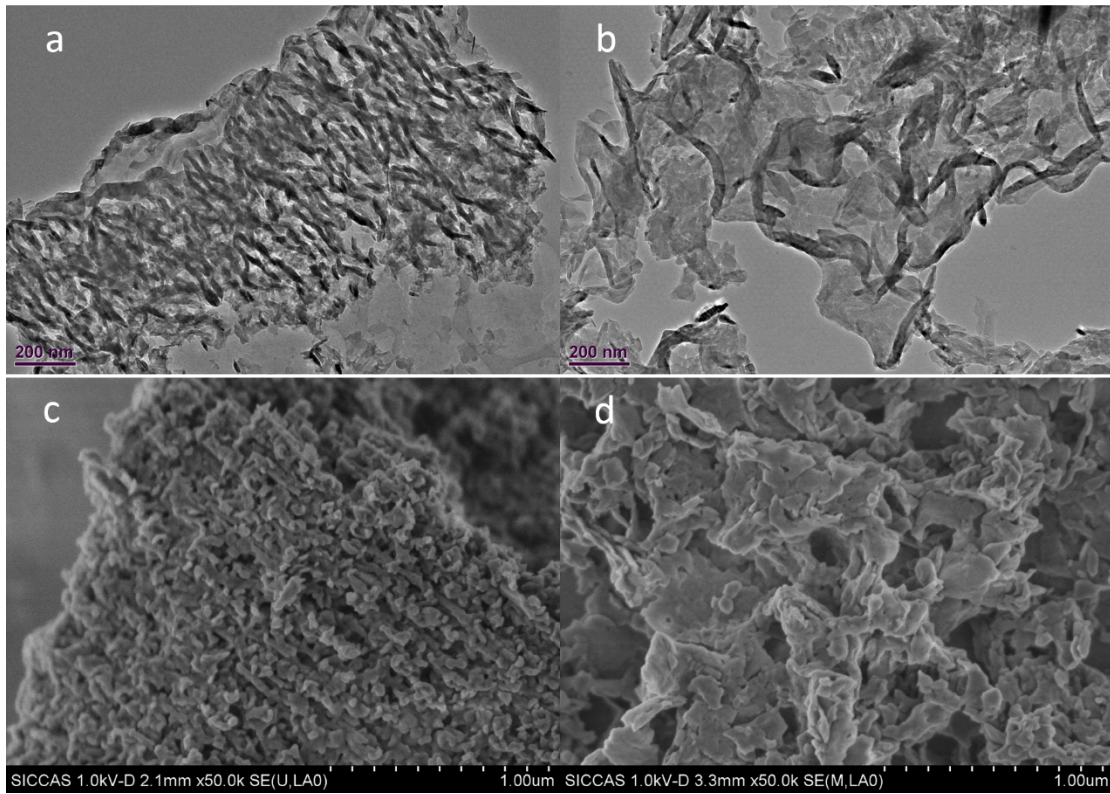

**Figure S9.** Typical TEM and SEM images of traditional g-C<sub>3</sub>N<sub>4</sub> (a and c, respectively) and CN-700 (b and d, respectively).
